# Supplementary material for: Iodine doping induced activation of covalent organic framework cathodes for Li-ion batteries
Source: Royal Society of Chemistry journal article supplement (doi:10.1039/d3ra01414b), 2023-01-01
Supplement: d3ra01414b1.pdf [file d3ra01414b1.pdf]

## Supporting Information

### Iodine doping induced activation of covalent organic framework cathodes for Li-ion batteries

Guoying Ren <sup>a</sup>, Fengshi Cai <sup>a\*</sup>, Shoucheng Wang <sup>a</sup>, Zhiqiang Luo <sup>b\*</sup>, Zhihao Yuan <sup>c</sup>

*a. Tianjin Key Lab for Photoelectric Materials and Devices, School of Materials Science and Engineering, Tianjin University of Technology, Tianjin 300384, China.*

*b. Key Laboratory of Display Materials and Photoelectric Devices (Tianjin University of Technology), Ministry of Education of China, Tianjin 300384, China.*

*c. National Demonstration Center for Experimental Function Materials Education, Tianjin University of Technology, Tianjin 300384, China.*

\* Corresponding authors: Fengshi Cai and Zhiqiang Luo

*E-mail address:* caifs@tjut.edu.cn; zhqluo@email.tjut.edu.cn

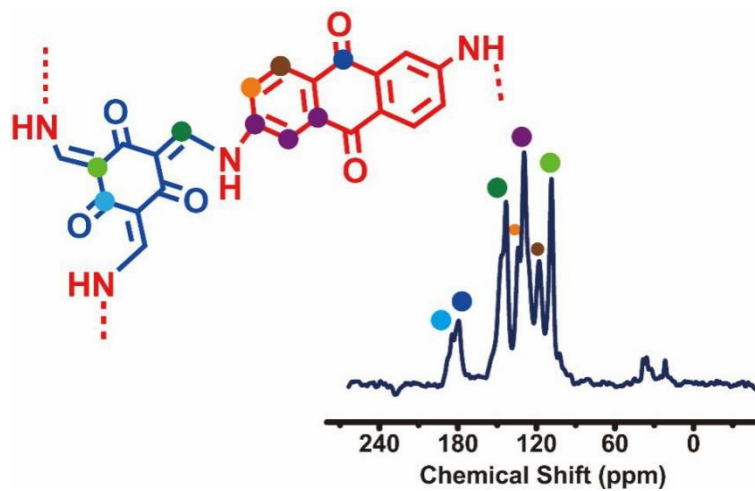

**Figure S1.** Solid-state  $^{13}\text{C}$  NMR spectrum of COF. The corresponding carbons are labeled in the structural motif (inset).

### COF

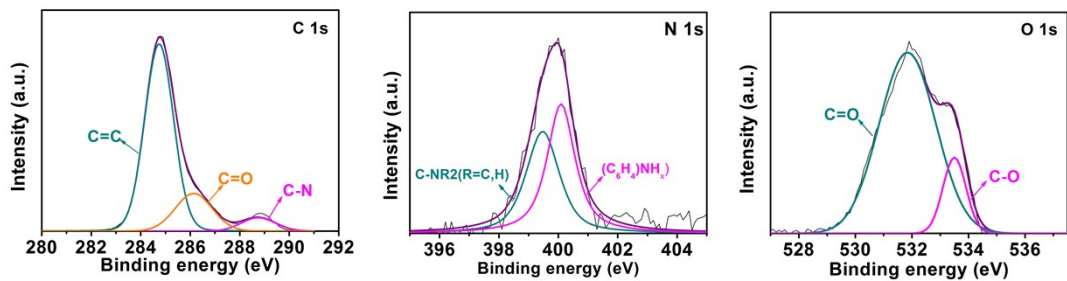

### COF-I

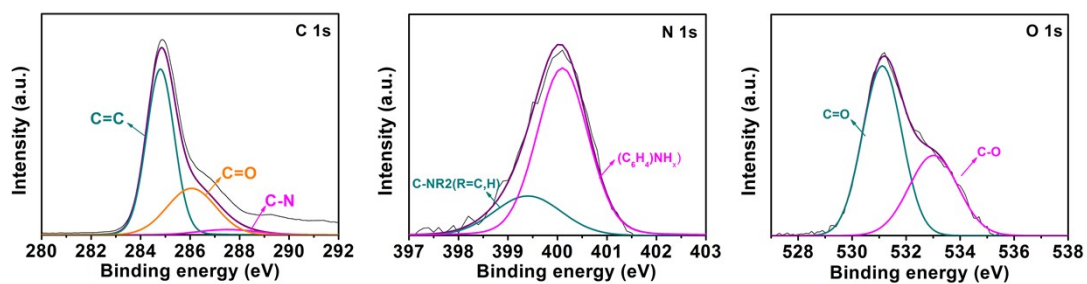

**Figure S2.** C 1s, N 1s, and O 1s high-resolution XPS spectra of COF and COF-I.

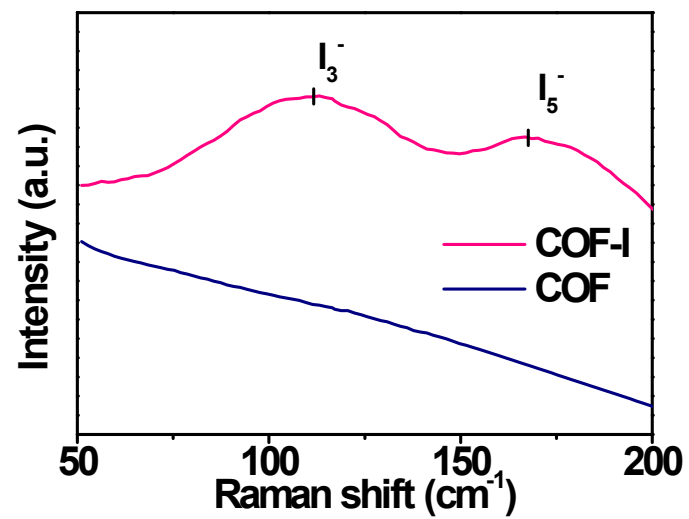

Figure S3. Raman spectra of COF and COF-I.

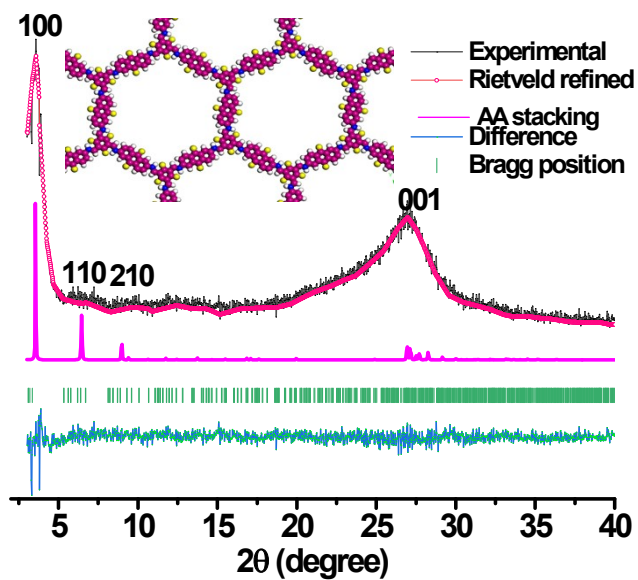

**Figure S4.** Experimental PXRD patterns, Pawley-refined patterns, simulated patterns, difference plots, Bragg positions for COF. The inset shows the simulated structure.

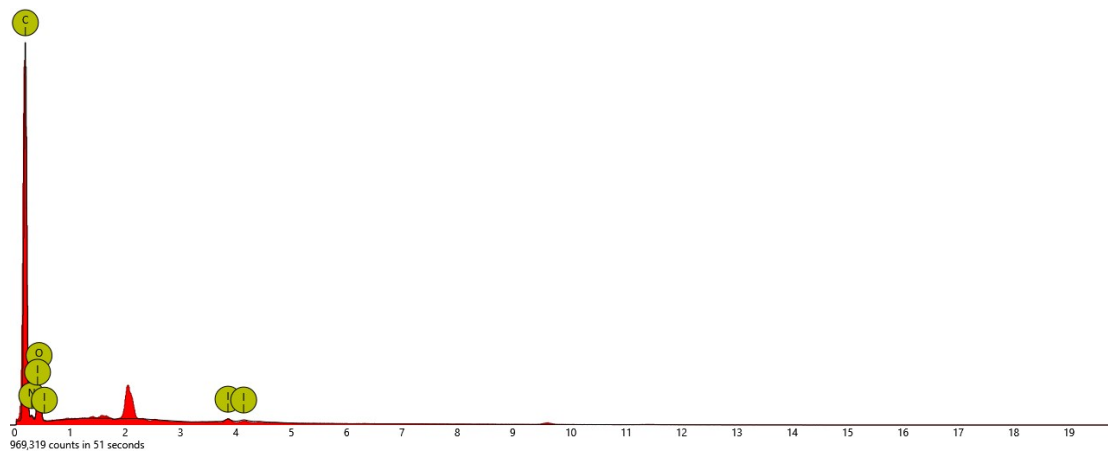

Weight percentage

|   |         |
|---|---------|
| C | 64.58 % |
| O | 22.60 % |
| N | 10.91 % |
| I | 1.92 %  |

**Figure S5.** Energy-dispersive spectroscopy of COF-I.

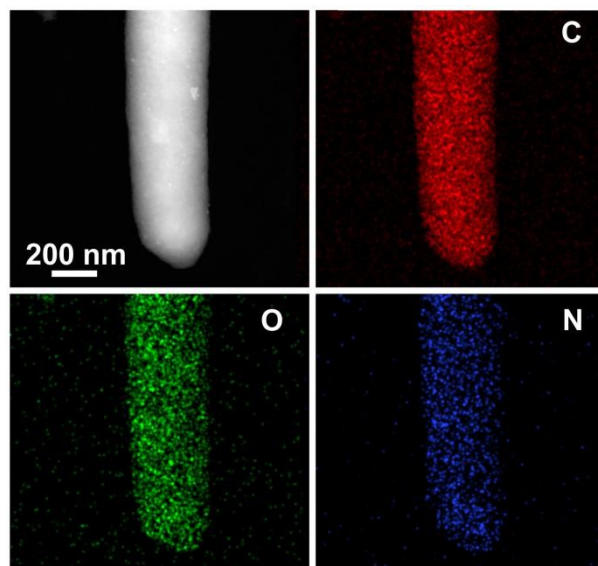

**Figure S6.** Energy-dispersive spectroscopy (EDS) elemental mapping images of C, N, O from the skeleton of COF. EDS images confirm the rodlike structure with a uniform distribution of C, N, O elements.

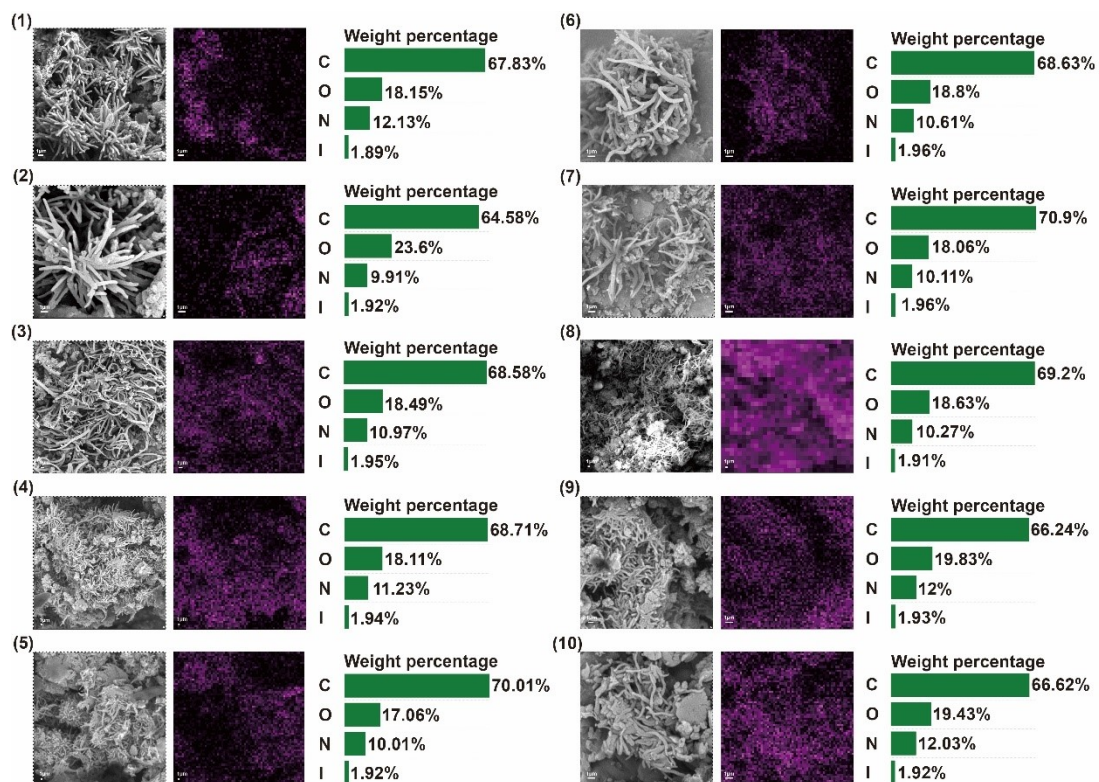

**Figure S7.** SEM images and the corresponding EDS for ten different batches of COF-I samples.



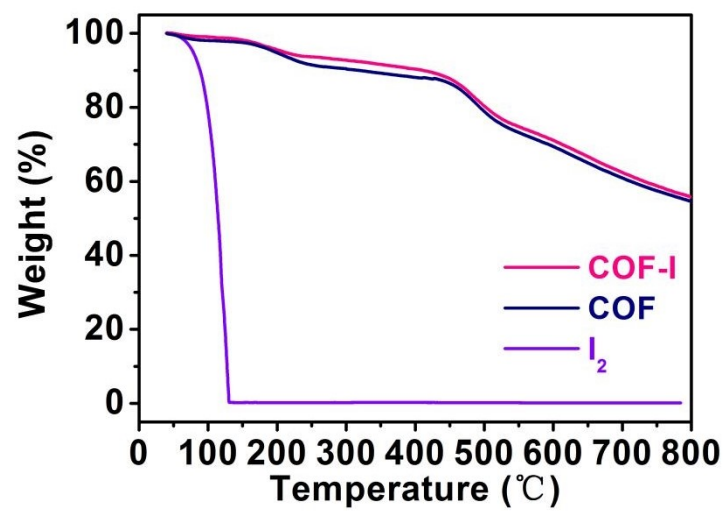

**Figure S8.** Thermogravimetric analysis curves of I<sub>2</sub>, COF and COF-I.

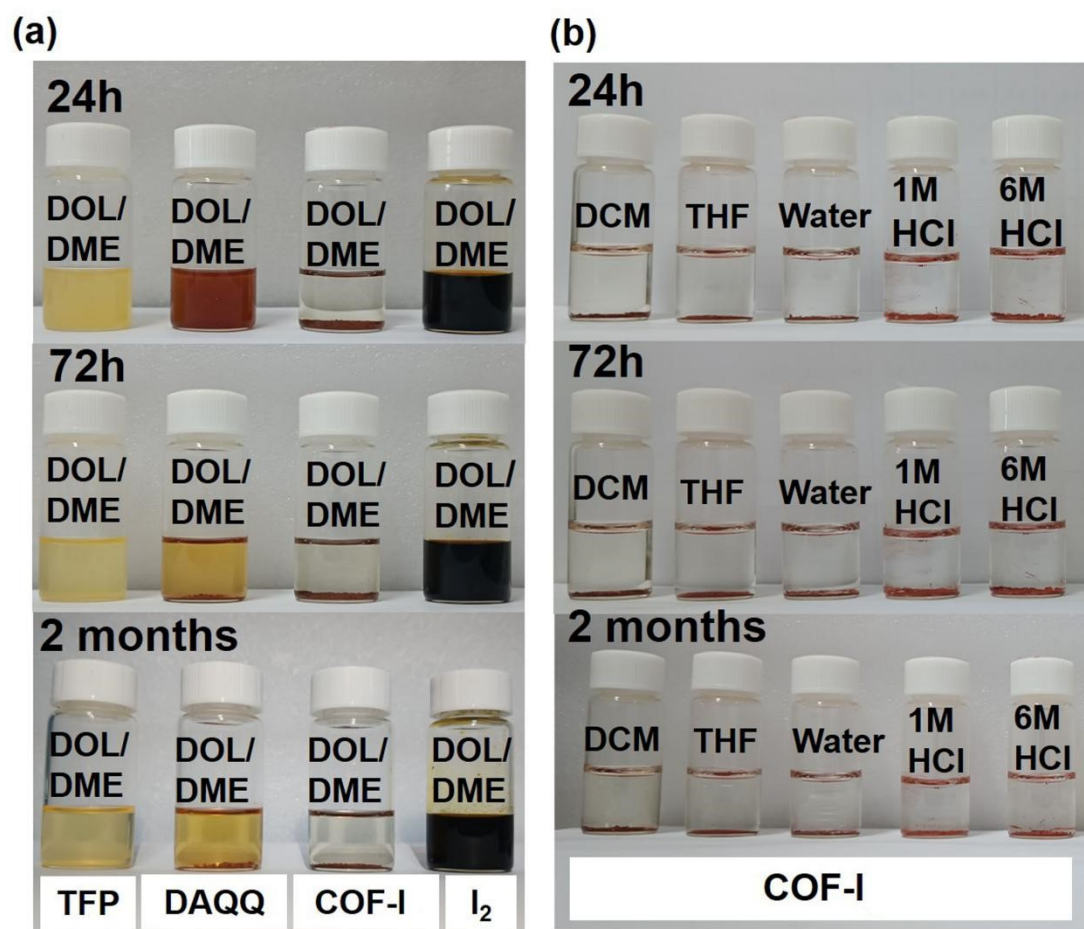

**Figure S9.** Chemical stability tests of COF-I in general solvents for 24h, 72h and 2 months.

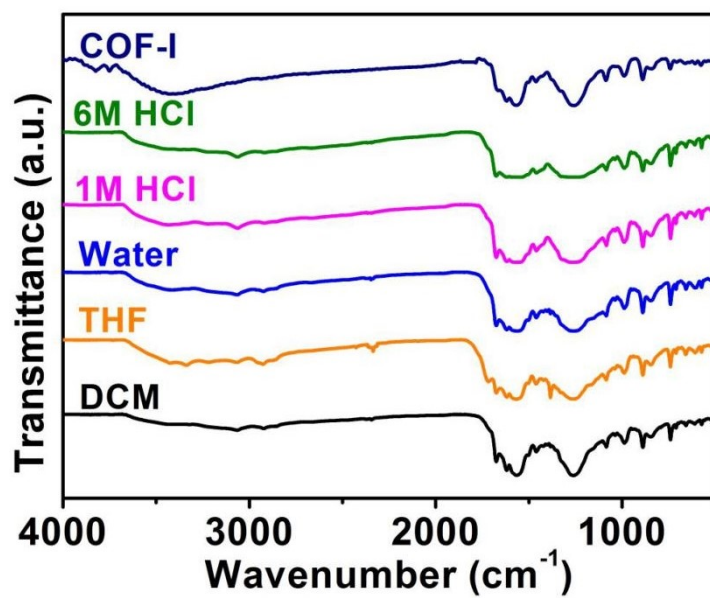

**Figure S10.** FT-IR spectra of COF-I after soaking in DCM, THF, water, 1M and 6 M HCl (aq.) for 24 hours.

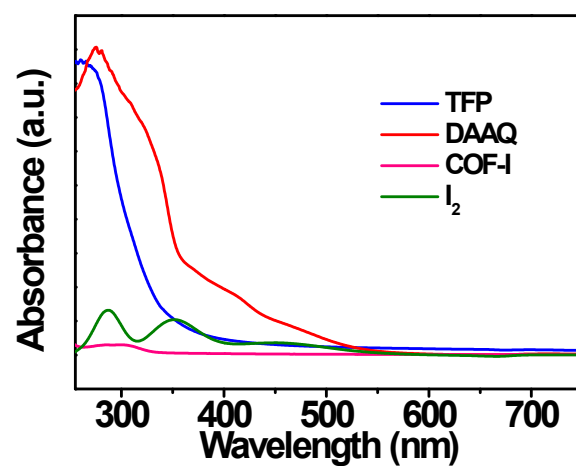

**Figure S11.** UV-vis absorption spectra of TFP, DAAQ, COF-I, I<sub>2</sub> after immersion treatments in 1,3-Dioxolane (DOL) / dimethoxyethane (DME) solvent for 2 months.

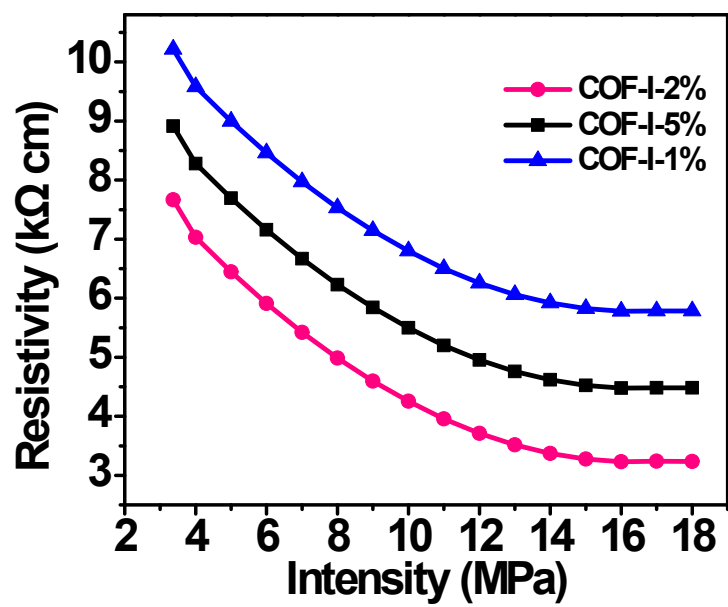

Figure S12. Relationship between pressure and resistivity for COF-I-1%, COF-I-2%, and COF-I-5%.

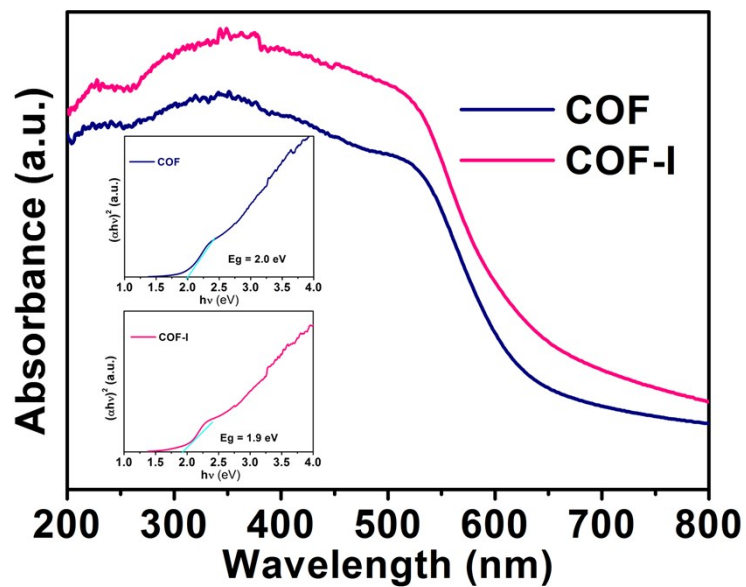

**Figure S13.** Solid-state UV-vis diffuse reflectance spectra for COF and COF-I. (inset) The corresponding K-M-transformed reflectance spectra.

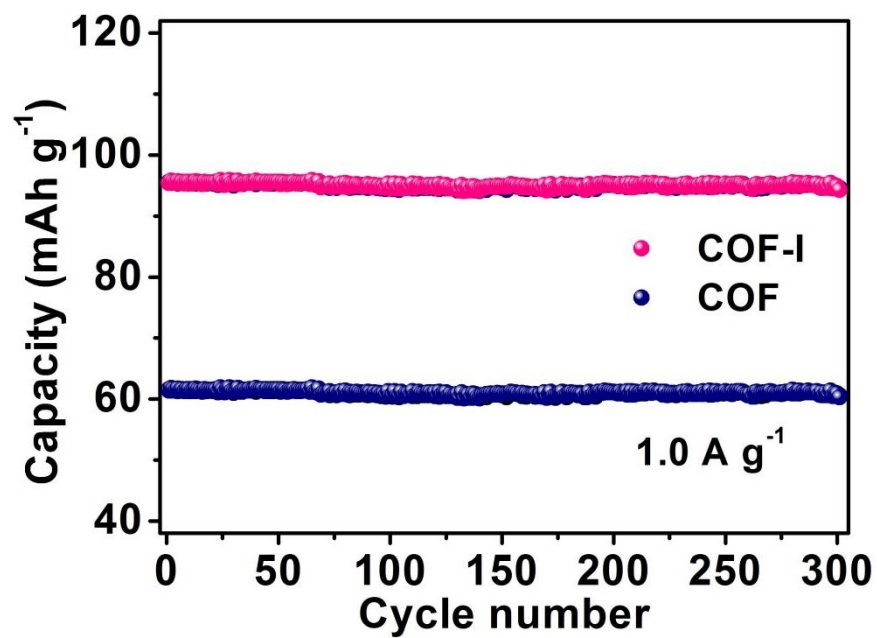

**Figure S14.** Cycling performances over 300 cycles at 1.0 A g<sup>-1</sup> for COF and COF-I.

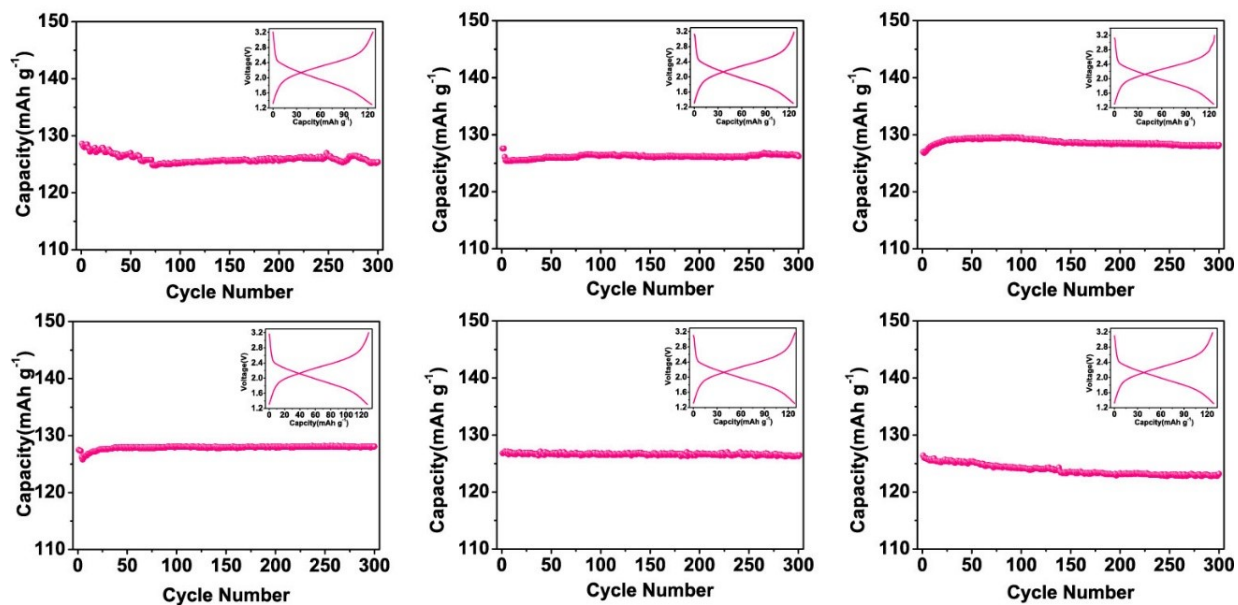

**Figure S15.** Cycling performances for six different batches of COF-I at 0.2 A g<sup>-1</sup>.



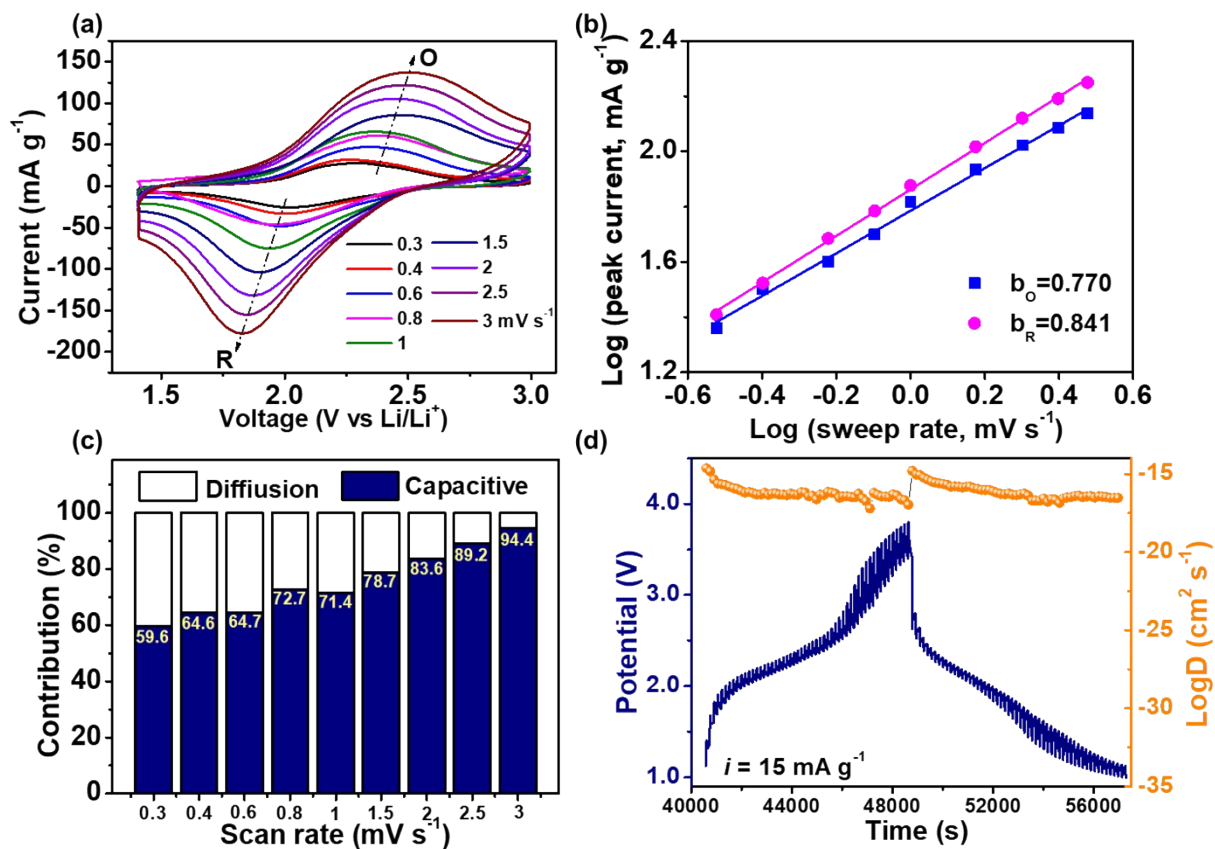

**Figure S16.** Kinetics analysis of COF. (a) CV curves obtained at different scan rates; (b)  $\log(i)$  versus  $\log(v)$  plots to determine the  $b$  values; (c) capacitive and diffusion contribution ratios to the total capacity at different scan rates; (d) GITT tests and corresponded ion diffusion coefficient of COF.

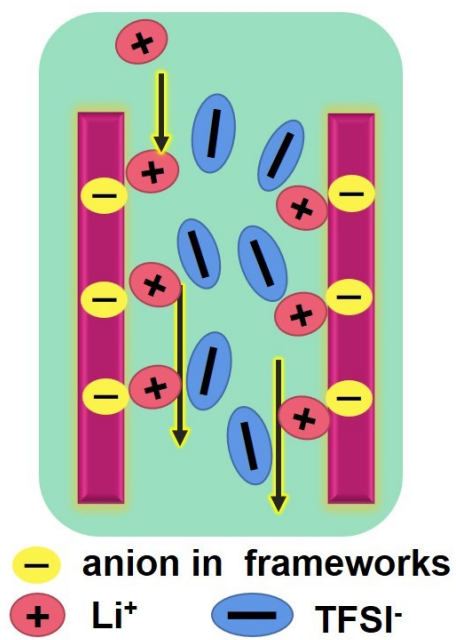

**Figure S17.** The diagram of Li<sup>+</sup> transport in COF-I.

**Table S1.** A comparison of the electrical properties of some previously reported COF materials at room temperature.

|    | COFs                  | Carrier mobility (cm <sup>2</sup> V <sup>-1</sup> s <sup>-1</sup> ) | Carrier mobility after iodine doping (cm <sup>2</sup> V <sup>-1</sup> s <sup>-1</sup> ) | Conductivity (S m <sup>-1</sup> ) | Conductivity after iodine doping (S m <sup>-1</sup> ) | References |
|----|-----------------------|---------------------------------------------------------------------|-----------------------------------------------------------------------------------------|-----------------------------------|-------------------------------------------------------|------------|
| 1  | DAAQ-COF              | 8.36                                                                | 11.05                                                                                   | 1.63×10 <sup>-4</sup>             | 2.28×10 <sup>-3</sup>                                 | This work□ |
| 2  | NiPc-CoTAA            | 0.15                                                                | -                                                                                       | 8.16×10 <sup>-3</sup>             | 0.52                                                  | [S1]       |
| 3  | COF-DC-8              | 8.10                                                                | -                                                                                       | 2.51×10 <sup>-3</sup>             | 2.51                                                  | [S2]       |
| 4  | TTF-COF               | -                                                                   | -                                                                                       | 1.20×10 <sup>-4</sup>             | 0.28                                                  | [S3]       |
| 5  | POR-COF               | -                                                                   | -                                                                                       | 4.6×10 <sup>-9</sup>              | 1.52×10 <sup>-5</sup>                                 | [S4]       |
| 6  | WBDT                  | -                                                                   | -                                                                                       | 2.7×10 <sup>-4</sup>              | 4.72×10 <sup>-2</sup>                                 | [S5]       |
| 7  | ZnPc-pz               | 4.80                                                                | 22                                                                                      | 7.0×10 <sup>-5</sup>              | 3.1×10 <sup>-2</sup>                                  | [S6]       |
| 8  | CuPc-pz               | 0.90                                                                | 7                                                                                       | 3.3×10 <sup>-5</sup>              | 1×10 <sup>-2</sup>                                    |            |
| 9  | TTF-ph-COF            | 0.2                                                                 | -                                                                                       | -                                 | 1.00×10 <sup>-3</sup>                                 | [S7]       |
| 10 | sp <sup>2</sup> c-COF | -                                                                   | -                                                                                       | 6.1×10 <sup>-14</sup>             | 7.10×10 <sup>-2</sup>                                 | [S8]       |
| 11 | TANG-COF              | -                                                                   | -                                                                                       | 1.6×10 <sup>-3</sup>              | 0.15                                                  | [S9]       |
| 12 | 3D p-POP              | -                                                                   | -                                                                                       | 5×10 <sup>-8</sup>                | 2.9×10 <sup>-5</sup>                                  | [S10]      |
| 13 | BUCT-COF-4            | 1.97                                                                | 2.62                                                                                    | 5.75×10 <sup>-6</sup>             | 2.79×10 <sup>-4</sup>                                 | [S11]      |

### References

S1. Y. Yue, P. Cai, X. Xu, H. Li, H. Chen, H. Zhou and N Huang, Conductive Metallophthalocyanine Framework Films with High Carrier Mobility as Efficient Chemiresistors, *Angew. Chem. Int. Ed.*, 2021, 60, 10806-10813.

S2. Z. Meng, R. Stolz, and K. Mirica, Two-Dimensional Chemiresistive Covalent Organic Framework with High Intrinsic Conductivity, *J. Am. Chem. Soc.*, 2019, 141, 11929-11937.

S3. S. Cai, Y. Zhang, A. Pun, B. He, J. Yang, F. Toma, I. Sharp, O. Yaghi, J. Fan, S. Zheng, W. Zhang and Y. Liu, Tunable electrical conductivity in oriented thin films of tetrathiafulvalene-based covalent organic framework, *Chem. Sci.*, 2014, 5, 4693-4700.

- S4. B. Nath, W. Li, J. Huang, G. Wang, Z. Fu, M. Yao and G. Xu, A new azodioxy-linked porphyrin-based semiconductive covalent organic framework with I2 doping-enhanced photoconductivity, *CrystEngComm*, 2016, 18, 4259-4263.
- S5. J. Rotter, R. Guntermann, M. Auth, A. Mähringer, A. Sperlich, V. Dyakonov, D. Medina and T. Bein, Highly conducting Wurster-type twisted covalent organic frameworks, *Chem. Sci.*, 2020, 11, 12843-12853
- S6. M. Wang, M. Wang, H. Lin, M. Ballabio, H. Zhong, M. Bonn, S. Zhou, T. Heine, E. Canovas, R. Dong and X. Feng, High-Mobility Semiconducting Two-Dimensional Conjugated Covalent Organic Frameworks with p-Type Doping, *J. Am. Chem. Soc.*, 2020, 142, 21622-21627.
- S7. S. Jin, T. Sakurai, T. Kowalczyk, S. Dalapati, F. Xu, H. Wei, X. Chen, J. Gao, S. Seki, S. Irle, and D. Jiang, Two-dimensional tetrathiafulvalene covalent organic frameworks: towards latticed conductive organic salts. *Chem. Eur. J.*, 2014, 20, 14608-14613.
- S8. E. Jin, M. Asada, Q. Xu, S. Dalapati, M. Addicoat, M. Brady, H. Xu, T. Nakamura, T. Heine, Q. Chen and D. Jiang, Two-dimensional sp<sup>2</sup> carbon-conjugated covalent organic frameworks, *Science*, 2017, 357, 673-676.
- S9. V. Lakshmi, C. Liu, M. Rao, Y. Chen, Y. Fang, A. Dadvand, E. Hamzehpoor, Y. Sakai-Otsuka, R. Stein and D. Perepichka, A Two-Dimensional Poly (azatriangulene) Covalent Organic Framework with Semiconducting and Paramagnetic States. *J. Am. Chem. Soc.*, 2020, 142, 2155-2160.
- S10. Y. Byun, L. Xie, P. Fritz, T. Ashirov, M. Dincă, A. Coskun, A Three-Dimensional Porous Organic Semiconductor Based on Fully sp<sup>2</sup>-Hybridized Graphitic Polymer. *Angew. Chem., Int. Ed.*, 2020, 59, 15166-15170.
- S11. S. Wang, X. Li, L. Da, Y. Wang, Z. Xiang, W. Wang, Y. Zhang and D. Cao, A Three-Dimensional sp<sup>2</sup> Carbon-Conjugated Covalent Organic Framework, *J. Am. Chem. Soc.*, 2021, 143, 15562-15566.
